# Supplementary material for: Two edges of the screen: Unpacking positive and negative associations between phone use in everyday contexts and subjective well-being
Source: PubMed Central journal article supplement (PMC10132652; doi:10.1371/journal.pone.0284104), 2023-04-26

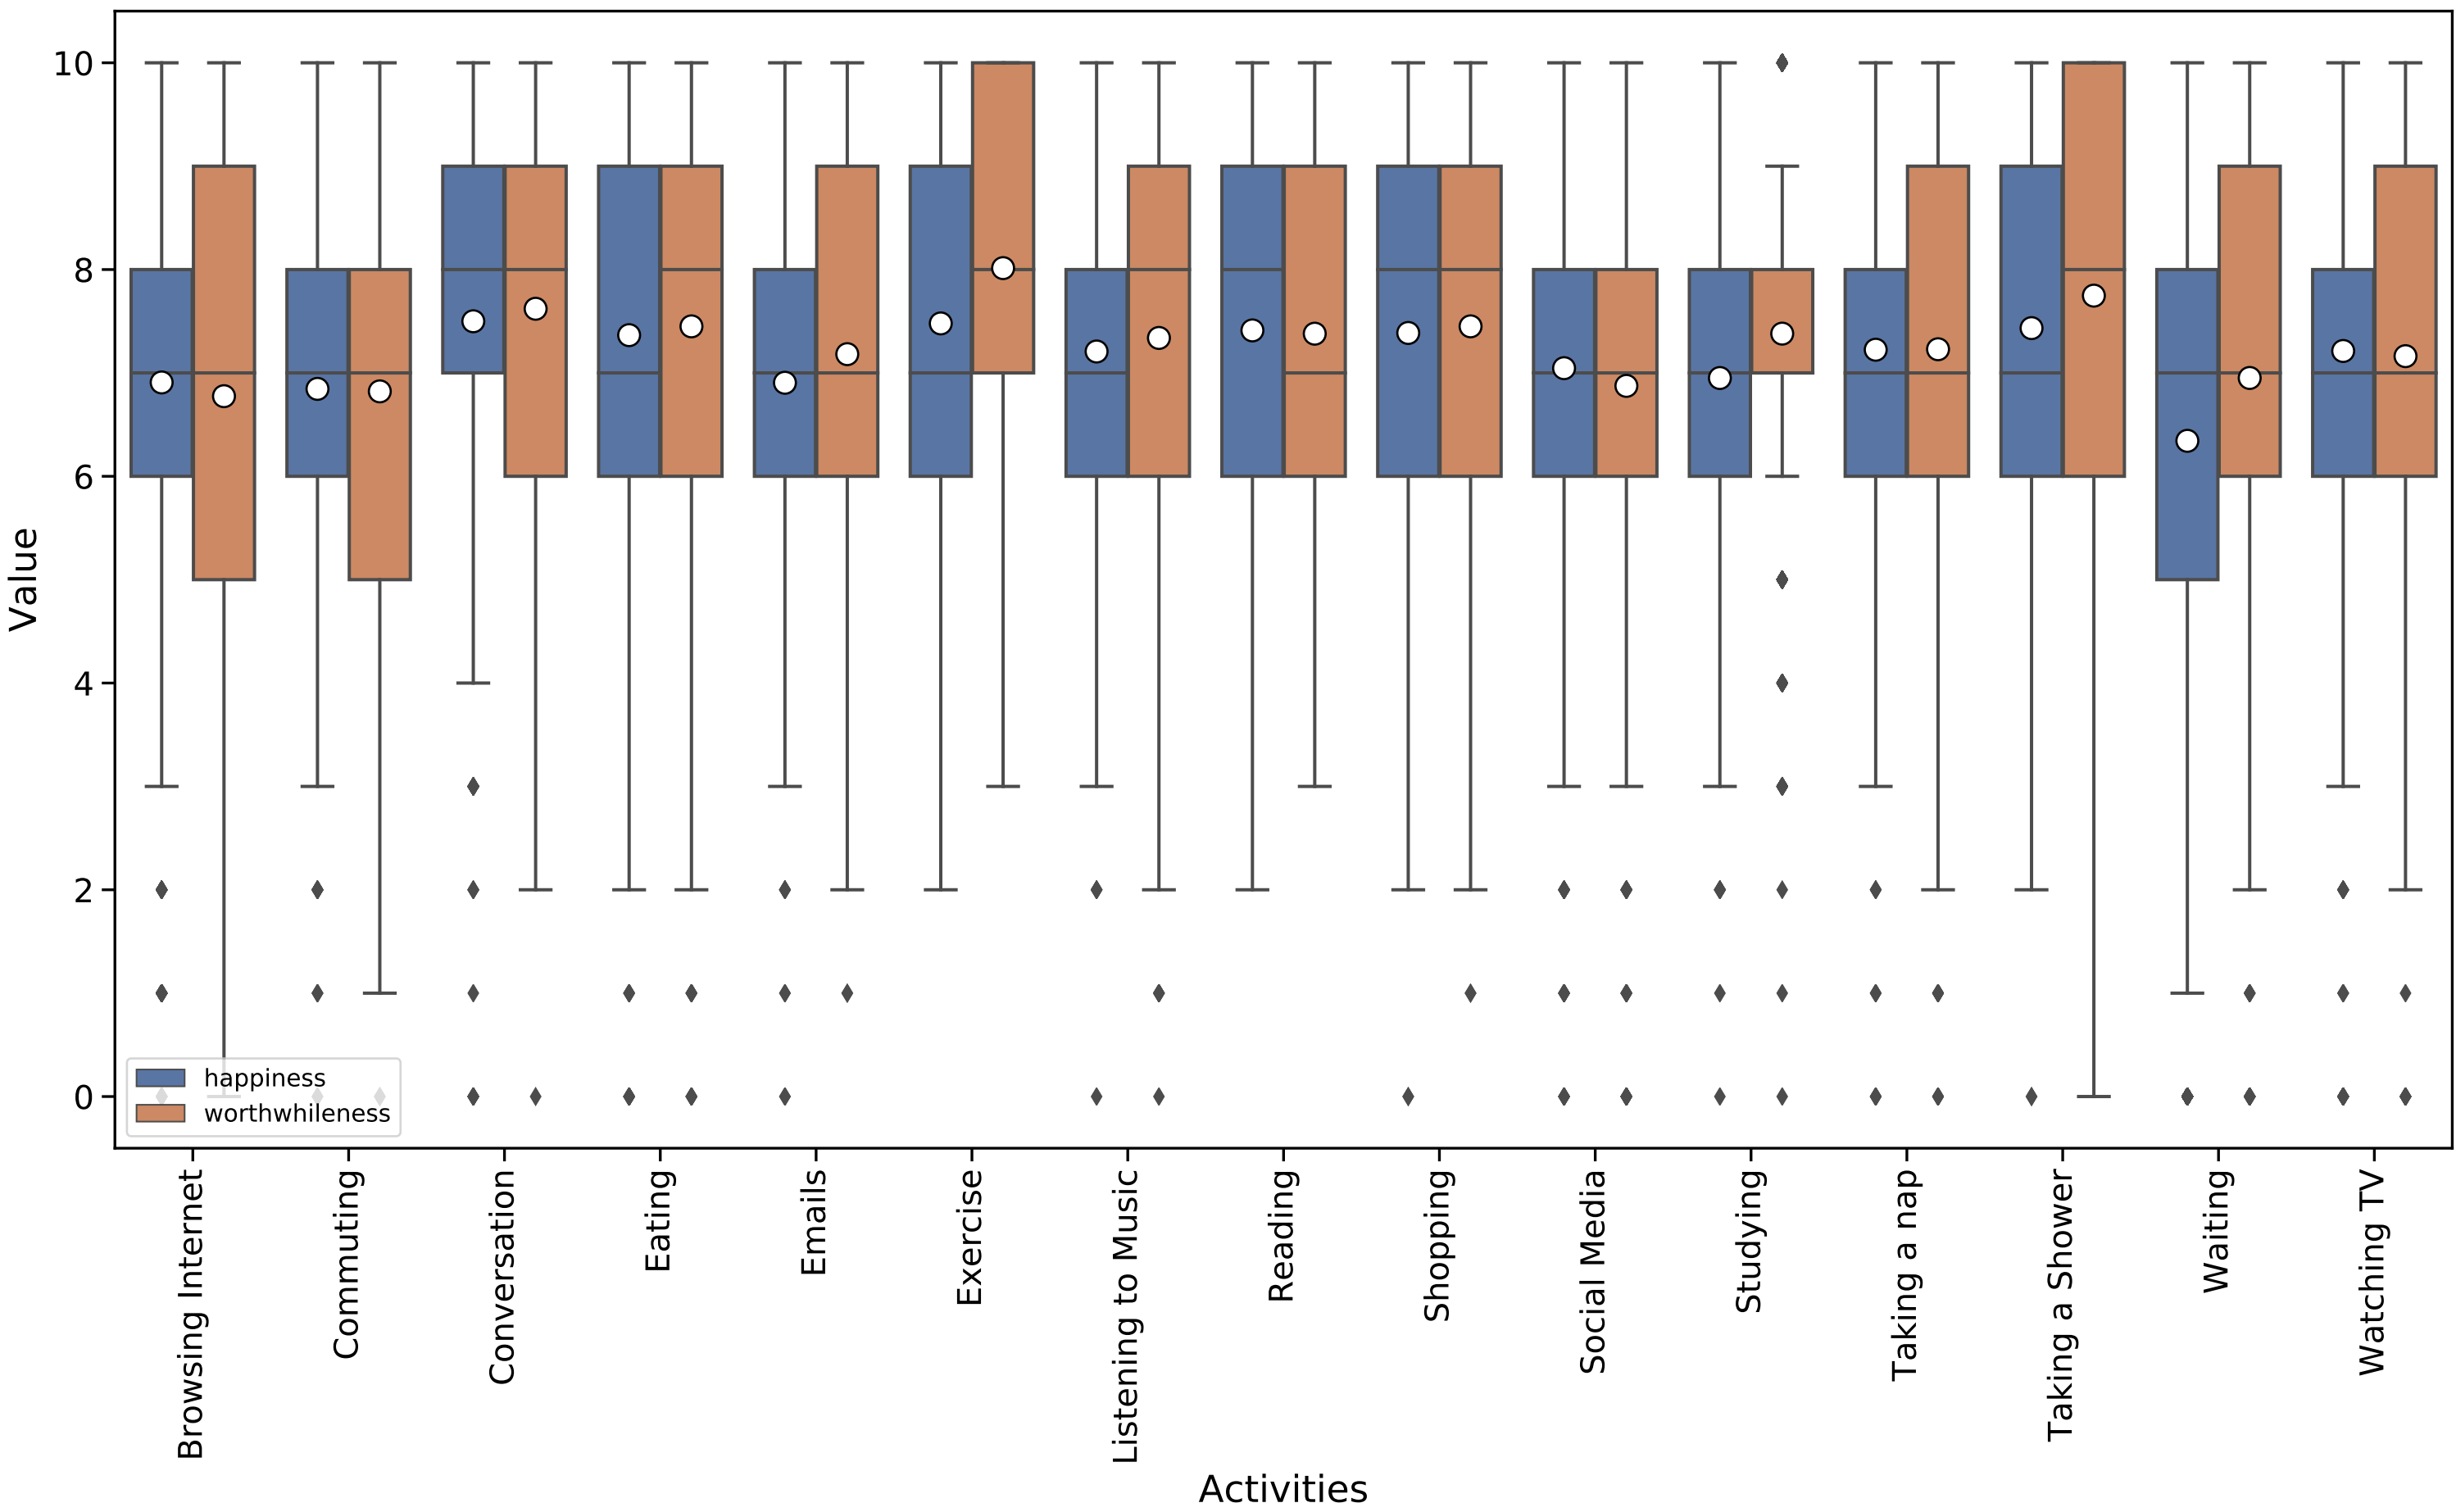

Supplement: pone.0284104.s001.pdf [file pone.0284104.s001.pdf]
